# Supplementary material for: SARS-CoV-2 Transmission in Belgian French-Speaking Primary Schools: An Epidemiological Pilot Study
Source: MDPI journal article supplement (doi:10.3390/v14102199), 2022-10-06
Supplement: s1 [file s1]

## Supplementary data:

**Table S1:** Weekly reporting of COVID-19 cases by the school health promotion department (SHPD).

| School n°  | Week |          | Reason for testing | Type of contact | School n°  | Week |          | Reason for testing | Type of contact |
|------------|------|----------|--------------------|-----------------|------------|------|----------|--------------------|-----------------|
| School n°1 | W7   | 1 pupil  | Symptoms           | Index           | School n°4 | W10  | 1 pupil  | Symptoms           | Index           |
|            | W11  | 1 SS     | Unknown            |                 |            | W11  | 2 pupils | Family contact     | Index           |
|            | W12  | 1 pupil  | Symptoms           | Index           |            | W17  | 1 pupil  | Family contact     | Index           |
| School n°2 | W9   | 1 pupil  | Family contact     | Index           | School n°5 | W3   | 1 pupil  | Symptoms           | Index           |
|            | W11  | 3 SS     | Symptoms           | Index           |            | W3   | 1 pupil  | Symptoms           | Secondary       |
|            | W11  | 6 pupils | Contacts           | Secondary       |            | W4   | 1 SS     | Other              | Index           |
|            | W11  | 1 pupil  | Symptoms           | Index           |            | W4   | 1 pupil  | Symptoms           | Index           |
|            | W11  | 1 pupil  | Family contact     | Index           |            | W4   | 1 pupil  | Family contact     | Index           |
|            | W12  | 6 pupils | Pupil contact      | Secondary       | School n°7 | W6   | 2 pupils | Symptoms           | Index           |
|            | W12  | 2 pupils | Family contact     | Index           |            | W8   | 1 pupil  | External contact   | Index           |
|            | W12  | 2 pupils | Symptoms           | Index           |            | W9   | 1 pupil  | Family contact     | Index           |
|            | W12  | 5 pupils | Contact            | Secondary       |            | W10  | 2 pupils | Family contact     | Index           |
|            | W14  | 2 pupils | Family contact     | Index           |            | W11  | 2SS      | Symptoms           | Index           |
|            | W16  | 1 SS     | Symptoms           | Index           | School n°8 | W9   | 2 pupils | Family contact     | Index           |
|            | W17  | 2 pupils | Family contact     | Index           |            | W9   | SS       | Other              | Index           |
|            | W17  | 1 pupil  | Symptoms           | Index           |            | W10  | 1 pupil  | Symptoms           | Index           |
|            | W17  | 1 pupil  | Pupil contact      | Secondary       |            | W12  | 1 SS     | Unknown            | Index           |
|            | W18  | 1 pupil  | Family contact     | Index           |            | W13  | 1SS      | Symptoms           | Index           |
| School n°3 | W17  | 1 pupil  | Family contact     | Index           |            |      |          |                    |                 |

Weekly reported numbers of pupils and staff with confirmed SARS-CoV-2 infections by SHPD, reason for testing (symptoms or high risk contact) and suspected source of infection (index case: contamination outside the school environment or secondary case: probable infection in the school environment). The weeks mentioned correspond to the calendar weeks of the year 2021.

**Table S1: Weekly reporting of COVID-19 cases by the school health promotion department (SHPD) (continued).**

| School n°  | Week |         | Reason for testing | Type of contact |
|------------|------|---------|--------------------|-----------------|
| School n°9 | W8   | 1 pupil | Family contact     | Index           |
|            | W8   | 1 pupil | Pupils contact     | Secondary       |
|            | W9   | 1 pupil | Family contact     | Index           |
|            | W10  | 1 pupil | Pupil contact      | Secondary       |
|            | W12  | 1 pupil | External contact   | Index           |
|            | W22  | 1 pupil | Symptoms           | Index           |
| School10   | W12  | SS      | Symptoms           | Index           |
|            | W17  | SS      | Symptoms           | Index           |
|            | W18  | 1 pupil | Family contact     | Index           |
|            | W20  | 1 pupil | Symptoms           | Index           |
|            | W20  | 1 pupil | External contact   | Index           |
| School 11  | W6   | 1 pupil | Other              | Index           |
|            | W17  | 1 pupil | Family contact     | Index           |
|            | W18  | 1 pupil | Family contact     | Index           |
|            | W19  | 1 pupil | General testing    | Secondary       |

Weekly reported numbers of pupils and staff with confirmed SARS-CoV-2 infections by SHPD reason for testing (symptoms or high risk contact) and suspected source of infection (index case: contamination outside the school environment or secondary case: probable infection in the school environment). The weeks mentioned correspond to the calendar weeks of the year 2021.

### Detailed description of SARS-CoV-2 whole-genome sequences method.

Positive samples presenting Ct values < 25 were then sequenced starting from the saliva samples stored at -80°C until sequencing. Two hundred µl of the transport media were used

for total nucleic acid extraction using the MagMAX™ Viral/Pathogen II Nucleic Acid Isolation Kit according to the manufacturer instructions (Cat. No. A48383, ThermoFisher Scientific). The amplicon-based Illumina COVIDSeq protocol (Illumina Inc, USA) in combination with the ARTIC v4 primers pools (<https://artic.network/>) was used for sequencing according to manufacturer's instructions. Briefly, a first strand cDNA was generated and amplified using a multiplex polymerase chain reaction (PCR) protocol, producing amplicons across the whole SARS-CoV-2 genome. The amplicons were later processed for tagmentation and adapter ligation using IDT for Illumina Nextera UD Indexes (Illumina Inc, USA). After additional PCR amplification of the tagmented amplicons and a bead-based cleanup, libraries were pooled together in a single tube. The final pool was quantified using Qubit 2.0 fluorometer (Invitrogen Inc.) and fragment size was evaluated using an Agilent 2100 Bioanalyzer (Agilent Inc). The pooled library was diluted to a final concentration of 100pM for a single read (1 x 150bp) sequencing on a NextSeq 1000 instrument. Generated fastq files were uploaded on the cloud-based ASP-IDNS®-5 analysis software (SmartGene). Analysis was made using the "SARS-CoV-2 full genome" pipeline version 2.5.0\_COV\_v0.2. Briefly, reads were automatically filtered for low quality sections. The resulting reads were mapped against the SARS-CoV-2 (Wuhan-hu-1/2019 (MN908947)) reference genome and mutations were detected in a quantitative manner (% reads aligned). A consensus genome was generated using a 40% cut-off for base determination and a minimal number of 30 reads per position. Online Nextclade version 2.3.0 software was used as a first sequence aligner, allowing comparison to the Wuhan-hu-1/2019 (MN908947) SARS-CoV-2 reference genome and permitting a clade assignment (<https://clades.nextstrain.org>). FASTA sequences were also submitted to the Pangolin (4.1.1) COVID-19 Lineage Assigner.
